# Supplementary material for: Developing a complex intervention to support timely engagement with palliative care for patients with advanced cancer in primary and secondary care in the UK: a study protocol
Source: PubMed Central journal article supplement (PMC5961581; doi:10.1136/bmjopen-2018-022835), 2018-05-14
Supplement: bmjopen-2018-022835.reviewer_comments.pdf [file bmjopen-2018-022835.reviewer_comments.pdf]

## PEER REVIEW HISTORY

BMJ Open publishes all reviews undertaken for accepted manuscripts. Reviewers are asked to complete a checklist review form (<http://bmjopen.bmj.com/site/about/resources/checklist.pdf>) and are provided with free text boxes to elaborate on their assessment. These free text comments are reproduced below.

## ARTICLE DETAILS

|                            |                                                                                                                                                                                 |
|----------------------------|---------------------------------------------------------------------------------------------------------------------------------------------------------------------------------|
| <b>TITLE (PROVISIONAL)</b> | Developing a complex intervention to support timely engagement with palliative care for patients with advanced cancer in primary and secondary care in the UK: A study protocol |
| <b>AUTHORS</b>             | Hackett, Julia; Bekker, Hilary; Bennett, Michael; Carder, Paul; Gallagher, Jean; Henry, Claire; Kite, Suzanne; Taylor, Sally; Velikova, Galina; Ziegler, Lucy                   |

This article was not externally reviewed at BMJ Open. Protocols that have been independently assessed prior to submission to BMJ Open are usually fast-tracked to publication on the grounds that further substantial changes will not be possible. This independent assessment will usually be external, independent review for both a substantial grant award from a non-commercial or government funder and ethics approval.
